# Supplementary material for: Predicting response to immunotherapy in advanced non-small-cell lung cancer using tumor mutational burden radiomic biomarker
Source: PubMed Central journal article supplement (PMC7342823; doi:10.1136/jitc-2020-000550), 2020-07-06
Supplement: jitc-2020-000550supp005.pdf [file jitc-2020-000550supp005.pdf]

**Table S1** Clinicopathological characteristics of the TMB dataset

| characteristics         | ALL<br>(N=327) | Training<br>cohort<br>(N=236) | Validation<br>cohort<br>(N=26) | <i>p</i><br>Value* | Test<br>cohort<br>(N=65) | <i>P</i><br>Value** |
|-------------------------|----------------|-------------------------------|--------------------------------|--------------------|--------------------------|---------------------|
| Age, year               | 61.5 ± 9.0     | 61.6 ± 8.9                    | 61.6 ± 9.1                     | 0.976              | 61.6 ± 9.5               | 0.741               |
| Sex                     |                |                               |                                | 0.385              |                          | 0.433               |
| Male                    | 180 (55.0)     | 135 (57.2)                    | 12 (46.2)                      |                    | 33 (50.8)                |                     |
| Female                  | 147 (45.0)     | 101 (42.8.3)                  | 14 (53.8)                      |                    | 32 (49.2)                |                     |
| Histological subtype    |                |                               |                                | 0.615              |                          | 0.807               |
| Adenocarcinoma          | 181 (55.4)     | 128 (54.2)                    | 16 (61.5)                      |                    | 37 (56.9)                |                     |
| Squamous cell carcinoma | 146 (44.6)     | 108 (45.8)                    | 10 (38.5)                      |                    | 28 (43.1)                |                     |
| Pathological stage      |                |                               |                                | 0.769              |                          | 0.900               |
| IA                      | 84 (25.7)      | 59 (25.0)                     | 8 (30.8)                       |                    | 17 (26.2)                |                     |
| IB                      | 115 (35.2)     | 85 (36.0)                     | 7 (26.9)                       |                    | 23 (35.4)                |                     |
| IIA                     | 18 (5.5)       | 13 (5.5)                      | 1 (3.8)                        |                    | 4 (6.2)                  |                     |
| IIB                     | 33 (10.1)      | 26 (11.0)                     | 2 (7.7)                        |                    | 5 (7.7)                  |                     |
| IIIA                    | 66 (20.2)      | 45 (19.1)                     | 6 (23.1)                       |                    | 15 (23.1)                |                     |
| IVA                     | 11 (3.4)       | 8 (3.4)                       | 2 (7.7)                        |                    | 1 (1.5)                  |                     |

|           |        |             |             |             |       |             |       |
|-----------|--------|-------------|-------------|-------------|-------|-------------|-------|
| Thickness |        |             |             |             | 0.759 |             | 0.286 |
|           | >= 1mm | 27 (8.3)    | 17 (7.2)    | 2 (7.7)     |       | 8 (12.3)    |       |
|           | < 1mm  | 300 (91.7)  | 219 (92.8)  | 24 (92.3)   |       | 57 (87.7)   |       |
| TMB       |        |             |             |             |       |             |       |
|           | Mean   | 7.64 ± 5.43 | 7.77 ± 5.58 | 6.70 ± 4.58 | 0.349 | 7.55 ± 5.11 | 0.778 |
|           | Range  | 0, 42.15    | 0, 42.15    | 0, 18.57    |       | 0, 20.56    |       |
| TMB Level |        |             |             |             | 0.397 |             | 0.307 |
|           | Low    | 243 (74.3)  | 177 (75.0)  | 22 (84.6)   |       | 44 (67.7)   |       |
|           | High   | 84 (25.7)   | 59 (25.0)   | 4 (15.4)    |       | 21 (32.3)   |       |

Categorical data are shown as numbers (%) and continuous data as mean ± SD; TMB, tumour mutation burden.

\* the p Value is the test result of the training cohort and the validation cohort;

\*\* the p Value is the test result of the training cohort and the test cohort.
