# Supplementary material for: Predicting response to immunotherapy in advanced non-small-cell lung cancer using tumor mutational burden radiomic biomarker
Source: PubMed Central journal article supplement (PMC7342823; doi:10.1136/jitc-2020-000550), 2020-07-06
Supplement: jitc-2020-000550supp006.pdf [file jitc-2020-000550supp006.pdf]

**Table S2** Associations between clinicopathological characteristics and TMB in the training cohort

| characteristics         | High Level<br>(N=68) | Low Level<br>(N=194) | <i>p</i> Value   |
|-------------------------|----------------------|----------------------|------------------|
| Age, year               | 62.7 ± 7.6           | 61.2 ± 9.3           | 0.239            |
| Sex                     |                      |                      | 0.595            |
| Male                    | 36 (61.0)            | 99 (55.9)            |                  |
| Female                  | 23 (39.0)            | 78 (44.1)            |                  |
| Histological subtype    |                      |                      | <b>&lt;0.001</b> |
| Adenocarcinoma          | 10 (16.9)            | 118 (66.7)           |                  |
| Squamous cell carcinoma | 49 (83.1)            | 59 (33.3)            |                  |
| Pathological stage      |                      |                      | 0.264            |
| IA                      | 13 (22.0)            | 46 (26.0)            |                  |
| IB                      | 21 (35.6)            | 64 (36.2)            |                  |
| IIA                     | 2 (3.4)              | 11 (6.0)             |                  |
| IIB                     | 10 (16.9)            | 16 (9.0)             |                  |
| IIIA                    | 13 (22.0)            | 32 (18.1)            |                  |
| IVA                     | -                    | 8 (4.5)              |                  |
| TMBRB                   |                      |                      | <b>&lt;0.001</b> |

---

|       |            |            |
|-------|------------|------------|
| Mean  | 0.63±0.14  | 0.36±0.12  |
| Range | 0.20, 0.82 | 0.11, 0.78 |

---

Categorical data are shown as numbers (%) and continuous data as mean ± SD; TMBRB, tumour mutation burden radiomics biomarker.
