# Supplementary material for: Predicting response to immunotherapy in advanced non-small-cell lung cancer using tumor mutational burden radiomic biomarker
Source: PubMed Central journal article supplement (PMC7342823; doi:10.1136/jitc-2020-000550), 2020-07-06
Supplement: jitc-2020-000550supp009.pdf [file jitc-2020-000550supp009.pdf]

**Table S3** Clinicopathological characteristics of the immunotherapy dataset

| Characteristics               | Overall survival |             |                | Progression-free survival |             |                |
|-------------------------------|------------------|-------------|----------------|---------------------------|-------------|----------------|
|                               | Hazard Rate (HR) | 95%CI       | <i>P</i> Value | Hazard Rate (HR)          | 95%CI       | <i>P</i> Value |
| Age, year (median as cut-off) | 0.88             | 0.52 ~ 1.47 | 0.600          | 1.09                      | 0.72 ~ 1.64 | 0.700          |
| Sex                           | 0.62             | 0.34 ~ 1.14 | 0.100          | 0.58                      | 0.35 ~ 0.96 | <b>0.030</b>   |
| Smoking status                | 0.86             | 0.50 ~ 1.47 | 0.600          | 0.65                      | 0.43 ~ 0.99 | <b>0.040</b>   |
| ECOG performance-status score | 2.38             | 1.14 ~ 4.96 | <b>0.020</b>   | 1.98                      | 1.16 ~ 3.38 | <b>0.010</b>   |
| Tumor histologic type         | 0.78             | 0.46 ~ 1.32 | 0.300          | 0.79                      | 0.52 ~ 1.20 | 0.300          |
| Pathological stage            | 0.60             | 0.29 ~ 1.23 | 0.200          | 0.67                      | 0.38 ~ 1.19 | 0.200          |
| EGFR mutations                | 1.49             | 0.85 ~ 2.62 | 0.200          | 1.47                      | 0.91 ~ 2.38 | 0.100          |
| TMBRB                         | 0.54             | 0.31 ~ 0.95 | <b>0.030</b>   | 1.78                      | 1.07 ~ 2.95 | <b>0.020</b>   |
